# Supplementary material for: Novel Effect of p-Coumaric Acid on Hepatic Lipolysis: Inhibition of Hepatic Lipid-Droplets
Source: MDPI journal article supplement (doi:10.3390/molecules28124641), 2023-06-08
Supplement: s1 [file s1]

# Novel effect of *p*-coumaric acid on hepatic lipolysis: Inhibition of hepatic lipid-droplets

Zhiyi Yuan<sup>1</sup>, Xi Lu<sup>2</sup>, Fan Lei<sup>2</sup>, Hong Sun<sup>3</sup>, Jingfei Jiang<sup>2</sup>, Dongming Xing<sup>2</sup>, Lijun Du<sup>2,\*</sup>

<sup>1</sup> College of Pharmacy, Chongqing Medical University, Chongqing 400016, China; yuanzhiyi-06@cqmu.edu.cn

<sup>2</sup> School of Life Sciences and School of Medicine, Tsinghua University, Beijing 100084, China

<sup>3</sup> Institute of Medicinal Plant and Development, Chinese Academy of Medical Sciences and Peking Union Medical College, Beijing 100094, China

\* Correspondence: lijundu@mail.tsinghua.edu.cn

## Supplementary Materials

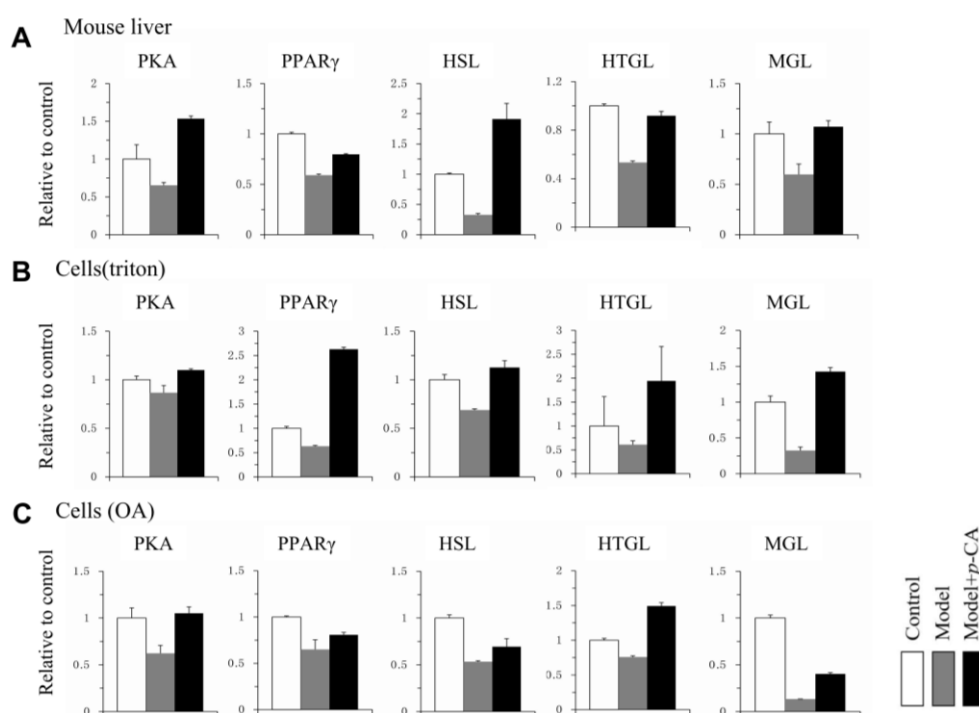

**Figure S1.** Effect of *p*-coumaric acid (*p*-CA) on mRNA expression of the proteins involved in lipid metabolism. (A): The expression of mouse liver ( $n=6$ ). (B): The expression of HepG2 cells induced with Triton WR1339. (C): The expression of HepG2 cells induced with OA. The data are presented as the mean  $\pm$  S.D. from six independent mice and three independent experiments *in vitro*.

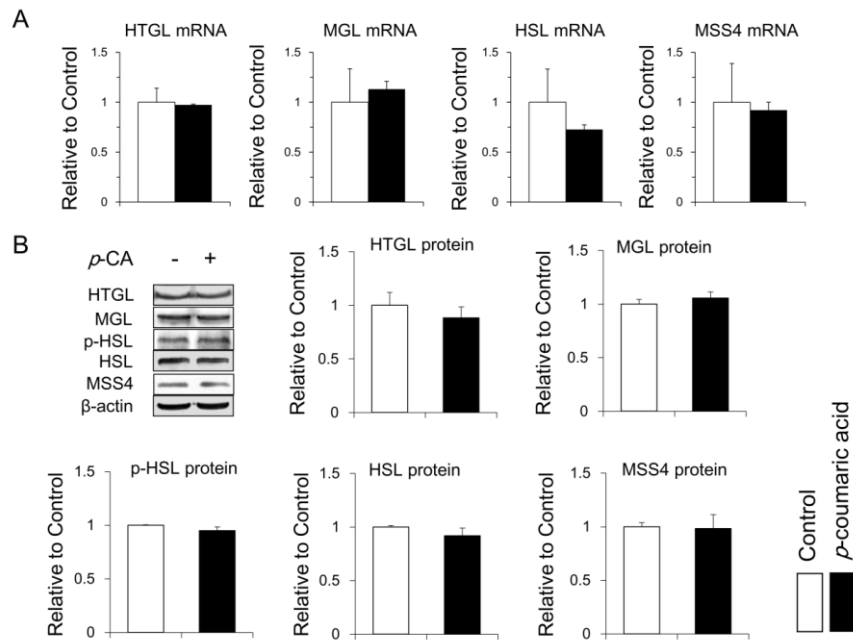

**Figure S2.** Effect of *p*-coumaric acid (*p*-CA) on mRNA expression of the proteins involved in lipid metabolism in normal mouse liver. (A): The expression of mRNA. (B): The expression of protein. The data are presented as the mean  $\pm$  S.D. from three independent experiments. There were no statistical significance between the control and *p*-CA groups.

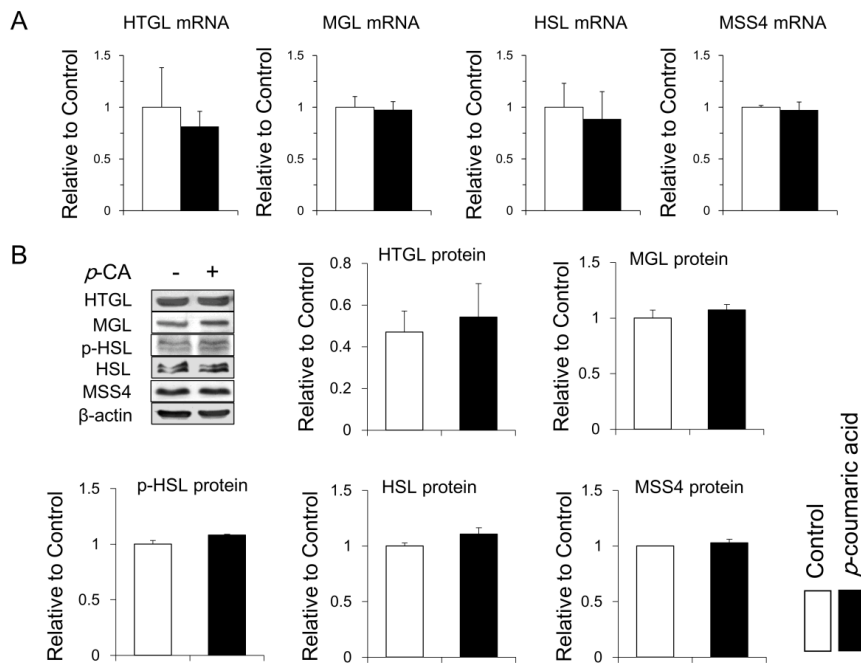

**Figure S3.** Effect of *p*-coumaric acid (*p*-CA) on mRNA expression of the proteins involved in lipid metabolism in normal HepG2 cells. (A): The expression of mRNA. (B): The expression of protein. The data are presented as the mean  $\pm$  S.D. from three independent experiments. There were no statistical significance between the control and *p*-CA groups.

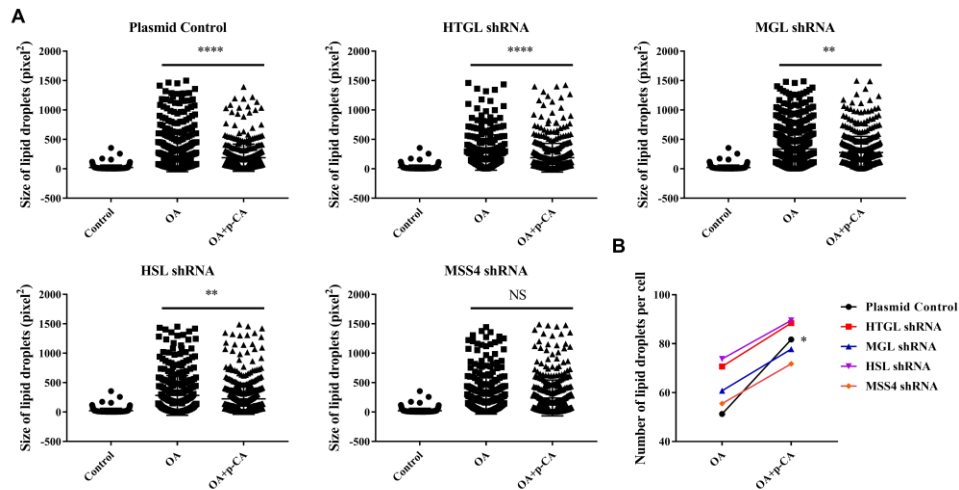

**Figure S4.** Effect of *p*-coumaric acid (*p*-CA) on the size of lipid droplets and the number per cell, when the gene of HTGL, MGL, HSL or MSS4 was knocked down in OA induced HepG2 cells. (A): The size (area) of lipid droplets ( $n=300-500$  lipid droplets). (B): The number of lipid droplets per cell ( $n=8-10$  cells). The symbol \* in (B) is vs the OA group in the negative control of plasmid PLL3.7. The data are from three independent experiments. vs. the OA group, \* $P < 0.05$ , \*\* $P < 0.01$ , \*\*\* $P < 0.001$ , \*\*\*\* $P < 0.0001$ . NS: no significance.

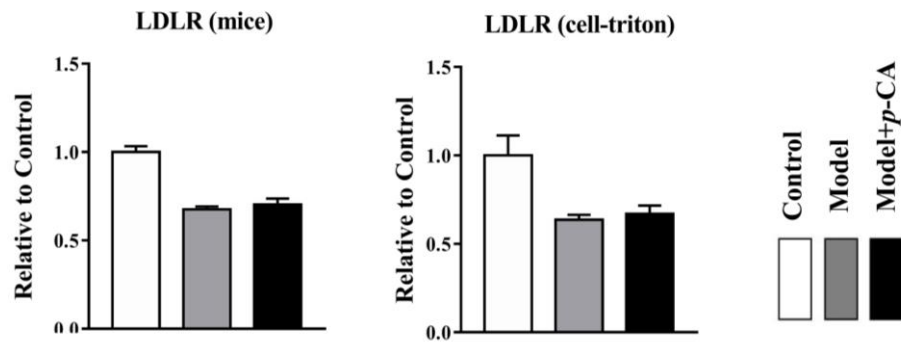

**Figure S5.** mRNA expression of LDLR after administration of *p*-coumaric acid (*p*-CA) in mouse liver and HepG2 cells. Data are presented as the mean  $\pm$  S.D. from six mice or three independent experiments *in vitro*.

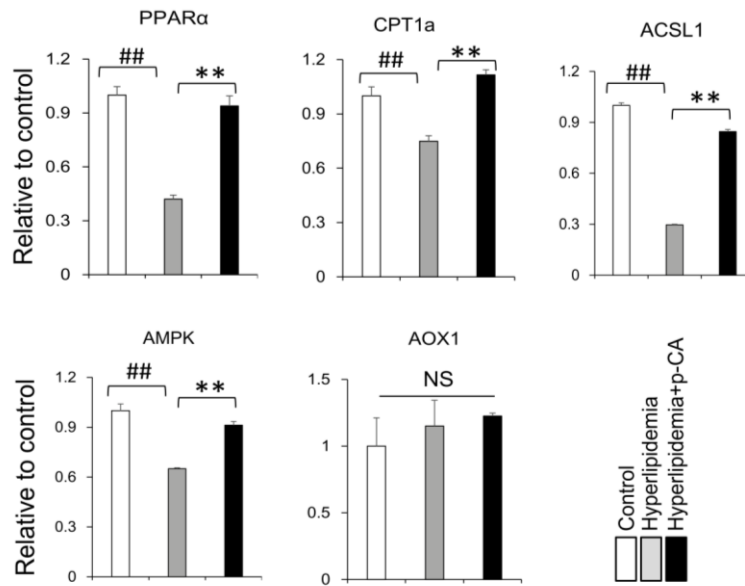

**Figure S6.** mRNA expression of PPAR $\alpha$ , CPT1A, ACSL1, AMPK and AOX1 after administration of *p*-coumaric acid (*p*-CA) in mouse liver. Triton WR1339 was administered at 350 mg/kg in mouse. The doses of *p*-CA were at 100 mg/kg. Data are presented as the mean  $\pm$  S.D. from six mice (three independent experiments). VS. the control,  $^{\#}P < 0.05$ ,  $^{\#\#}P < 0.01$ .  $^{**}$ , VS. the hyperlipidemic mice,  $^{*}P < 0.05$ ,  $^{**}P < 0.01$ . NS: no significance.

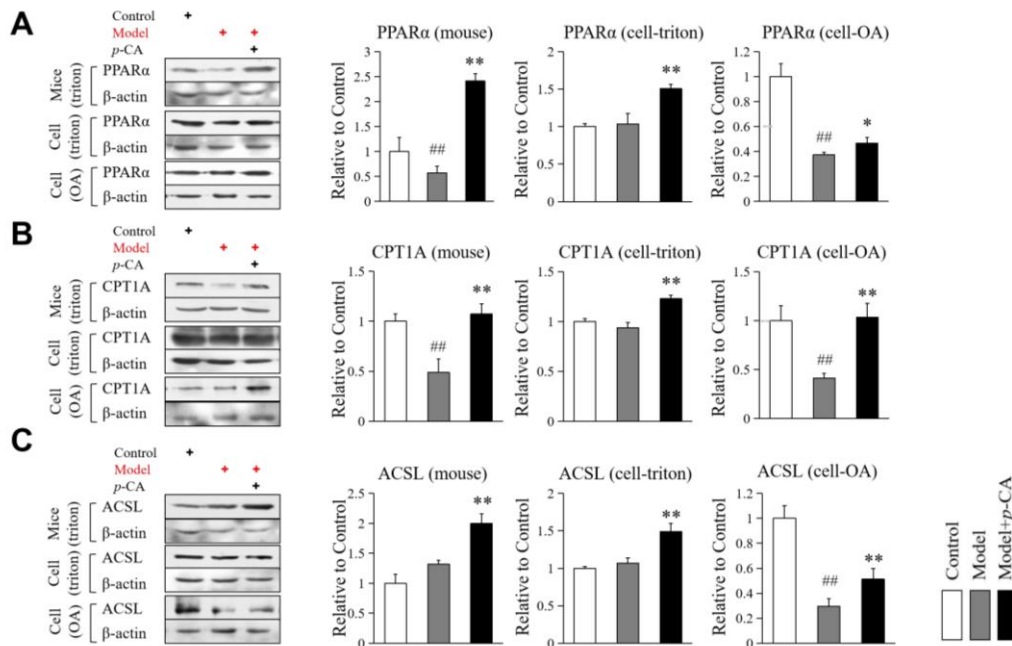

**Figure S7.** Effect of *p*-CA on the PPAR $\alpha$  and its downstream target genes CPT1A and ACSL1 in mouse liver *in vivo* and HepG2 cells *in vitro*. (A): The expression of PPAR $\alpha$ . (B): The expression of CPT1A. (C): The expression of ACSL. The concentration of Triton WR1339, OA and *p*-CA used was the same as that in Fig.2. The symbol of + in red or black indicates how cells or mice were processed. The data are presented as the mean  $\pm$  S.D. from six independent mice and three independent experiments *in vitro*. VS. the control (normal),  $^{\#}P < 0.01$ ,  $^{\#\#}P < 0.01$ . VS. the model mice (cells),  $^{*}P < 0.05$  and  $^{**}P < 0.01$ .
